# Supplementary material for: Ocean Warming Amplifies the Effects of Ocean Acidification on Skeletal Mineralogy and Microstructure in the Asterinid Starfish Aquilonastra yairi
Source: MDPI journal article supplement (doi:10.3390/jmse10081065), 2022-08-03
Supplement: s1 [file s1]

## Supplementary Material

### **Ocean Warming Amplifies the Effects of Ocean Acidification on Skeletal Mineralogy and Microstructure in the Asterinid Starfish *Aquilonastra yairi***

Munawar Khalil<sup>1,2,3,\*</sup>, Steve S. Doo<sup>1,4</sup>, Marleen Stuhr<sup>1</sup>, Hildegard Westphal<sup>1,2,4</sup>

<sup>1</sup> Leibniz Centre for Tropical Marine Research (ZMT), 28359 Bremen, Germany; steve.doo@leibniz-zmt.de (S.S.D.); marleen.stuhr@leibniz-zmt.de (M.S.)

<sup>2</sup> Faculty of Geosciences, University of Bremen, 28359 Bremen, Germany

<sup>3</sup> Department of Marine Science, Faculty of Agriculture, Universitas Malikussaleh, Reuleut Main Campus, Aceh 24355, Indonesia

<sup>4</sup> Physical Science and Engineering (PSE) and Red Sea Research Center (RSRC), King Abdullah University of Science and Technology (KAUST), Thuwal 23955-6900, Saudi Arabia; hildegard.westphal@kaust.edu.sa (H.W.)

**\*Corresponding author:** Munawar Khalil

Email: munawar.khalil@leibniz-zmt.de

## **Supplementary Materials and Methods:**

### ***Animal collection and acclimation:***

To prepare the *Aquilonastra yairi* specimens for the experiment, they were cleansed from externally attached materials, thoroughly rinsed with flowing seawater repeatedly and small forceps to lift the attached debris, and allowed to acclimate in a communal tank with a recirculating water system at the ambient temperature of  $\sim 27^\circ\text{C}$  for seven days. Afterwards, they were randomly distributed into 18 experimental aquaria (25 litres), illuminated with LED lamps (Aquaillumination® Hydra 52 HD) at  $25\text{--}30\ \mu\text{mol photons m}^{-2}\text{ s}^{-1}$ . After an additional seven-day acclimation phase, the main experiment was started. No visual sign of stress (i.e., discoloration and erratic flipping) was observed during the acclimation period. During acclimation and experimental exposure, the starfish *A. yairi* were able to feed on living diatoms that naturally grow at the aquaria walls and deposited detritus flocs.

### ***Seawater chemistry control and manipulation:***

Temperature, salinity, and  $\text{pH}_{\text{NBS}}$  (pH electrodes calibrated in diluted National Bureau of Standards buffers) were measured three times per week using a calibrated multielectrode portable probe (WTW Multiline 3630 IDS, Xylem Analytics, Weilheim, Germany). The  $\text{pH}_{\text{total scale}}$  was measured weekly via spectrophotometry (Shimadzu UV-1700 Pharma Spec UV-Vis Spectrophotometer) following SOP 6b [1] using the indicator dye *m*-cresol purple (Sigma-Aldrich). Seawater samples for total alkalinity ( $A_T$ ) and dissolved inorganic carbon (DIC) analysis were collected weekly in 500-mL borosilicate glass vials, poisoned with 200- $\mu\text{L}$  of saturated mercuric chloride ( $\text{HgCl}_2$ ) solution and refrigerated until analysis.  $A_T$  and DIC were measured according to the best practice of ocean acidification seawater measurement protocols [1].  $A_T$  was measured by open-cell potentiometric Gran titration (precision,  $\pm 10\ \mu\text{mol kg}^{-1}$ ), and DIC was determined by the colorimetric analytical method using a Shimadzu DIC analyser (precision,  $\pm 10\ \mu\text{mol kg}^{-1}$ ).

The seawater carbonate system parameters  $p\text{CO}_2$ , carbonate ion concentration  $[\text{CO}_3^{2-}]$ , bicarbonate ion concentration  $[\text{HCO}_3^-]$ , aqueous  $\text{CO}_2$ , calcite saturation state ( $\Omega_{\text{Ca}}$ ), aragonite saturation state ( $\Omega_{\text{Ar}}$ ) were calculated with the program  $\text{CO}_2\text{SYS}$  for Microsoft Excel [2], using Hansson [3] and Mehrbach, *et al.* [4] refitted by Dickson and Millero [5] for  $K_1$  and  $K_2$  carbonic acid constants; Dickson [6] for  $K_{\text{HSO}_4}$  equilibrium constant; Dickson and Riley [7] for  $K_{\text{HF}}$  dissociation constant; Uppström [8] for the boric acid constant ( $[\text{B}]_{\text{T}}$ ); and Mucci [9] for the stoichiometric calcite solubility constant.

### **References:**

1. Dickson, A.G.; Sabine, C.L.; Christian, J.R. (Eds.) *Guide to Best Practices for Ocean  $\text{CO}_2$  Measurements*; PICES Special Publication 3; North Pacific Marine Science Organization: British Columbia, Canada, 2007; Volume 3, p. 191.
2. Pelletier, G.; Lewis, E.; Wallace, D.  *$\text{CO}_2\text{SYS.xls}$ : A calculator for the  $\text{CO}_2$  System in Seawater for Microsoft Excel/VBA*, Washington State Department for Ecology, Olympia, WA: Brookhaven National Laboratory, Upton, NY, 2007.
3. Hansson, I. A new set of acidity constants for carbonic acid and boric acid in sea water. *Deep Sea Res. A*. **1973**, 20, 461-478, doi:10.1016/0011-7471(73)90100-9.
4. Mehrbach, C.; Culberson, C.H.; Hawley, J.E.; Pytkowicz, R.M. Measurement of the apparent dissociation constants of carbonic acid in seawater at atmospheric pressure. *Limnol. Oceanogr.* **1973**, 18, 897-907, doi:10.4319/lo.1973.18.6.0897.
5. Dickson, A.G.; Millero, F.J. A comparison of the equilibrium constants for the dissociation of carbonic acid in seawater media. *Deep Sea Res. A*. **1987**, 34, 1733-1743, doi:10.1016/0198-0149(87)90021-5.
6. Dickson, A.G. Standard potential of the reaction:  $\text{AgCl(s)} + 1/2\text{H}_2(\text{g}) = \text{Ag(s)} + \text{HCl(aq)}$ , and the standard acidity constant of the ion  $\text{HSO}_4^-$  in synthetic seawater from

- 273.15 to 318.15 K. *J. Chem. Thermodyn.* **1990**, 22, 113-127, doi:10.1016/0021-9614(90)90074-z.
7. Dickson, A.G.; Riley, J.P. The estimation of acid dissociation constants in seawater media from potentiometric titrations with strong base. I. The ionic product of water -  $K_w$ . *Mar. Chem.* **1979**, 7, 89-99, doi:10.1016/0304-4203(79)90001-x.
  8. Uppström, L.R. The boron/chlorinity ratio of deep-sea water from the Pacific Ocean. *Deep Sea Res. A.* **1974**, 21, 161-162, doi:10.1016/0011-7471(74)90074-6.
  9. Mucci, A. The solubility of calcite and aragonite in seawater at various salinities, temperatures, and one atmosphere total pressure. *Am. J. Sci.* **1983**, 283, 780-799, doi:10.2475/ajs.283.7.780.

# Supplementary table:

**Table S1.** Tukey HSD post hoc test for the interactive effects of incubation time (45 and 90 days),  $p\text{CO}_2$  (455  $\mu\text{atm}$ , 1052  $\mu\text{atm}$ , 2066  $\mu\text{atm}$ ) and temperature (27 °C, 32 °C) on skeletal Mg/Ca ratio of *A. yairi* using the ‘agricolae R-package’ for multiple comparisons to interrogate the main effects of incubation time, temperature and  $p\text{CO}_2$  (incubation time :  $p\text{CO}_2$  : temperature = 0.014, Table 2).

| Condition                                                                  | diff.   | lwr.     | upr.    | $p_{adj}$ |
|----------------------------------------------------------------------------|---------|----------|---------|-----------|
| 90 days:1052 $\mu\text{atm}$ :27 °C vs 45 days:1052 $\mu\text{atm}$ :27 °C | 5.4800  | -7.3920  | 18.3520 | 0.9156    |
| 45 days:2066 $\mu\text{atm}$ :27 °C vs 45 days:1052 $\mu\text{atm}$ :27 °C | -1.3833 | -14.2553 | 11.4887 | 1.0000    |
| 90 days:2066 $\mu\text{atm}$ :27 °C vs 45 days:1052 $\mu\text{atm}$ :27 °C | 5.3933  | -7.4787  | 18.2653 | 0.9233    |
| 45 days:455 $\mu\text{atm}$ :27 °C vs 45 days:1052 $\mu\text{atm}$ :27 °C  | 2.3467  | -10.5253 | 15.2187 | 0.9999    |
| 90 days:455 $\mu\text{atm}$ :27 °C vs 45 days:1052 $\mu\text{atm}$ :27 °C  | 0.0400  | -12.8320 | 12.9120 | 1.0000    |
| 45 days:1052 $\mu\text{atm}$ :32 °C vs 45 days:1052 $\mu\text{atm}$ :27 °C | 9.3533  | -3.5187  | 22.2253 | 0.3220    |
| 90 days:1052 $\mu\text{atm}$ :32 °C vs 45 days:1052 $\mu\text{atm}$ :27 °C | 5.0967  | -7.7753  | 17.9687 | 0.9460    |
| 45 days:2066 $\mu\text{atm}$ :32 °C vs 45 days:1052 $\mu\text{atm}$ :27 °C | 2.0433  | -10.8287 | 14.9153 | 1.0000    |
| 90 days:2066 $\mu\text{atm}$ :32 °C vs 45 days:1052 $\mu\text{atm}$ :27 °C | 4.5700  | -8.3020  | 17.4420 | 0.9741    |
| 45 days:455 $\mu\text{atm}$ :32 °C vs 45 days:1052 $\mu\text{atm}$ :27 °C  | 0.3467  | -12.5253 | 13.2187 | 1.0000    |
| 90 days:455 $\mu\text{atm}$ :32 °C vs 45 days:1052 $\mu\text{atm}$ :27 °C  | 10.3000 | -2.5720  | 23.1720 | 0.2077    |
| 45 days:2066 $\mu\text{atm}$ :27 °C vs 90 days:1052 $\mu\text{atm}$ :27 °C | -6.8633 | -19.7353 | 6.0087  | 0.7355    |
| 90 days:2066 $\mu\text{atm}$ :27 °C vs 90 days:1052 $\mu\text{atm}$ :27 °C | -0.0867 | -12.9587 | 12.7853 | 1.0000    |
| 45 days:455 $\mu\text{atm}$ :27 °C vs 90 days:1052 $\mu\text{atm}$ :27 °C  | -3.1333 | -16.0053 | 9.7387  | 0.9988    |
| 90 days:455 $\mu\text{atm}$ :27 °C vs 90 days:1052 $\mu\text{atm}$ :27 °C  | -5.4400 | -18.3120 | 7.4320  | 0.9192    |
| 45 days:1052 $\mu\text{atm}$ :32 °C vs 90 days:1052 $\mu\text{atm}$ :27 °C | 3.8733  | -8.9987  | 16.7453 | 0.9926    |
| 90 days:1052 $\mu\text{atm}$ :32 °C vs 90 days:1052 $\mu\text{atm}$ :27 °C | -0.3833 | -13.2553 | 12.4887 | 1.0000    |
| 45 days:2066 $\mu\text{atm}$ :32 °C vs 90 days:1052 $\mu\text{atm}$ :27 °C | -3.4367 | -16.3087 | 9.4353  | 0.9972    |
| 90 days:2066 $\mu\text{atm}$ :32 °C vs 90 days:1052 $\mu\text{atm}$ :27 °C | -0.9100 | -13.7820 | 11.9620 | 1.0000    |
| 45 days:455 $\mu\text{atm}$ :32 °C vs 90 days:1052 $\mu\text{atm}$ :27 °C  | -5.1333 | -18.0053 | 7.7387  | 0.9435    |
| 90 days:455 $\mu\text{atm}$ :32 °C vs 90 days:1052 $\mu\text{atm}$ :27 °C  | 4.8200  | -8.0520  | 17.6920 | 0.9626    |
| 90 days:2066 $\mu\text{atm}$ :27 °C vs 45 days:2066 $\mu\text{atm}$ :27 °C | 6.7767  | -6.0953  | 19.6487 | 0.7494    |
| 45 days:455 $\mu\text{atm}$ :27 °C vs 45 days:2066 $\mu\text{atm}$ :27 °C  | 3.7300  | -9.1420  | 16.6020 | 0.9945    |
| 90 days:455 $\mu\text{atm}$ :27 °C vs 45 days:2066 $\mu\text{atm}$ :27 °C  | 1.4233  | -11.4487 | 14.2953 | 1.0000    |
| 45 days:1052 $\mu\text{atm}$ :32 °C vs 45 days:2066 $\mu\text{atm}$ :27 °C | 10.7367 | -2.1353  | 23.6087 | 0.1667    |
| 90 days:1052 $\mu\text{atm}$ :32 °C vs 45 days:2066 $\mu\text{atm}$ :27 °C | 6.4800  | -6.3920  | 19.3520 | 0.7951    |
| 45 days:2066 $\mu\text{atm}$ :32 °C vs 45 days:2066 $\mu\text{atm}$ :27 °C | 3.4267  | -9.4453  | 16.2987 | 0.9973    |
| 90 days:2066 $\mu\text{atm}$ :32 °C vs 45 days:2066 $\mu\text{atm}$ :27 °C | 5.9533  | -6.9187  | 18.8253 | 0.8657    |
| 45 days:455 $\mu\text{atm}$ :32 °C vs 45 days:2066 $\mu\text{atm}$ :27 °C  | 1.7300  | -11.1420 | 14.6020 | 1.0000    |
| 90 days:455 $\mu\text{atm}$ :32 °C vs 45 days:2066 $\mu\text{atm}$ :27 °C  | 11.6833 | -1.1887  | 24.5553 | 0.1000    |
| 45 days:455 $\mu\text{atm}$ :27 °C vs 90 days:2066 $\mu\text{atm}$ :27 °C  | -3.0467 | -15.9187 | 9.8253  | 0.9990    |
| 90 days:455 $\mu\text{atm}$ :27 °C vs 90 days:2066 $\mu\text{atm}$ :27 °C  | -5.3533 | -18.2253 | 7.5187  | 0.9266    |

|                                                              |         |              |         |        |
|--------------------------------------------------------------|---------|--------------|---------|--------|
| 45 days:1052 $\mu$ atm:32 °C vs 90 days:2066 $\mu$ atm:27 °C | 3.9600  | −8.9120      | 16.8320 | 0.9912 |
| 90 days:1052 $\mu$ atm:32 °C vs 90 days:2066 $\mu$ atm:27 °C | −0.2967 | −13.168<br>7 | 12.5753 | 1.0000 |
| 45 days:2066 $\mu$ atm:32 °C vs 90 days:2066 $\mu$ atm:27 °C | −3.3500 | −16.222<br>0 | 9.5220  | 0.9978 |
| 90 days:2066 $\mu$ atm:32 °C vs 90 days:2066 $\mu$ atm:27 °C | −0.8233 | −13.695<br>3 | 12.0487 | 1.0000 |
| 45 days:455 $\mu$ atm:32 °C vs 90 days:2066 $\mu$ atm:27 °C  | −5.0467 | −17.918<br>7 | 7.8253  | 0.9493 |
| 90 days:455 $\mu$ atm:32 °C vs 90 days:2066 $\mu$ atm:27 °C  | 4.9067  | −7.9653      | 17.7787 | 0.9578 |
| 90 days:455 $\mu$ atm:27 °C vs 45 days:455 $\mu$ atm:27 °C   | −2.3067 | −15.178<br>7 | 10.5653 | 0.9999 |
| 45 days:1052 $\mu$ atm:32 °C vs 45 days:455 $\mu$ atm:27 °C  | 7.0067  | −5.8653      | 19.8787 | 0.7118 |
| 90 days:1052 $\mu$ atm:32 °C vs 45 days:455 $\mu$ atm:27 °C  | 2.7500  | −10.122<br>0 | 15.6220 | 0.9996 |
| 45 days:2066 $\mu$ atm:32 °C vs 45 days:455 $\mu$ atm:27 °C  | −0.3033 | −13.175<br>3 | 12.5687 | 1.0000 |
| 90 days:2066 $\mu$ atm:32 °C vs 45 days:455 $\mu$ atm:27 °C  | 2.2233  | −10.648<br>7 | 15.0953 | 1.0000 |
| 45 days:455 $\mu$ atm:32 °C vs 45 days:455 $\mu$ atm:27 °C   | −2.0000 | −14.872<br>0 | 10.8720 | 1.0000 |
| 90 days:455 $\mu$ atm:32 °C vs 45 days:455 $\mu$ atm:27 °C   | 7.9533  | −4.9187      | 20.8253 | 0.5470 |
| 45 days:1052 $\mu$ atm:32 °C vs 90 days:455 $\mu$ atm:27 °C  | 9.3133  | −3.5587      | 22.1853 | 0.3276 |
| 90 days:1052 $\mu$ atm:32 °C vs 90 days:455 $\mu$ atm:27 °C  | 5.0567  | −7.8153      | 17.9287 | 0.9487 |
| 45 days:2066 $\mu$ atm:32 °C vs 90 days:455 $\mu$ atm:27 °C  | 2.0033  | −10.868<br>7 | 14.8753 | 1.0000 |
| 90 days:2066 $\mu$ atm:32 °C vs 90 days:455 $\mu$ atm:27 °C  | 4.5300  | −8.3420      | 17.4020 | 0.9757 |
| 45 days:455 $\mu$ atm:32 °C vs 90 days:455 $\mu$ atm:27 °C   | 0.3067  | −12.565<br>3 | 13.1787 | 1.0000 |
| 90 days:455 $\mu$ atm:32 °C vs 90 days:455 $\mu$ atm:27 °C   | 10.2600 | −2.6120      | 23.1320 | 0.2119 |
| 90 days:1052 $\mu$ atm:32 °C vs 45 days:1052 $\mu$ atm:32 °C | −4.2567 | −17.128<br>7 | 8.6153  | 0.9846 |
| 45 days:2066 $\mu$ atm:32 °C vs 45 days:1052 $\mu$ atm:32 °C | −7.3100 | −20.182<br>0 | 5.5620  | 0.6601 |
| 90 days:2066 $\mu$ atm:32 °C vs 45 days:1052 $\mu$ atm:32 °C | −4.7833 | −17.655<br>3 | 8.0887  | 0.9645 |
| 45 days:455 $\mu$ atm:32 °C vs 45 days:1052 $\mu$ atm:32 °C  | −9.0067 | −21.878<br>7 | 3.8653  | 0.3724 |
| 90 days:455 $\mu$ atm:32 °C vs 45 days:1052 $\mu$ atm:32 °C  | 0.9467  | −11.925<br>3 | 13.8187 | 1.0000 |
| 45 days:2066 $\mu$ atm:32 °C vs 90 days:1052 $\mu$ atm:32 °C | −3.0533 | −15.925<br>3 | 9.8187  | 0.9990 |
| 90 days:2066 $\mu$ atm:32 °C vs 90 days:1052 $\mu$ atm:32 °C | −0.5267 | −13.398<br>7 | 12.3453 | 1.0000 |
| 45 days:455 $\mu$ atm:32 °C vs 90 days:1052 $\mu$ atm:32 °C  | −4.7500 | −17.622<br>0 | 8.1220  | 0.9661 |
| 90 days:455 $\mu$ atm:32 °C vs 90 days:1052 $\mu$ atm:32 °C  | 5.2033  | −7.6687      | 18.0753 | 0.9384 |
| 90 days:2066 $\mu$ atm:32 °C vs 45 days:2066 $\mu$ atm:32 °C | 2.5267  | −10.345<br>3 | 15.3987 | 0.9998 |
| 45 days:455 $\mu$ atm:32 °C vs 45 days:2066 $\mu$ atm:32 °C  | −1.6967 | −14.568<br>7 | 11.1753 | 1.0000 |
| 90 days:455 $\mu$ atm:32 °C vs 45 days:2066 $\mu$ atm:32 °C  | 8.2567  | −4.6153      | 21.1287 | 0.4943 |
| 45 days:455 $\mu$ atm:32 °C vs 90 days:2066 $\mu$ atm:32 °C  | −4.2233 | −17.095<br>3 | 8.6487  | 0.9855 |
| 90 days:455 $\mu$ atm:32 °C vs 90 days:2066 $\mu$ atm:32 °C  | 5.7300  | −7.1420      | 18.6020 | 0.8910 |
| 90 days:455 $\mu$ atm:32 °C vs 45 days:455 $\mu$ atm:32 °C   | 9.9533  | −2.9187      | 22.8253 | 0.2455 |

Supplementary figure:

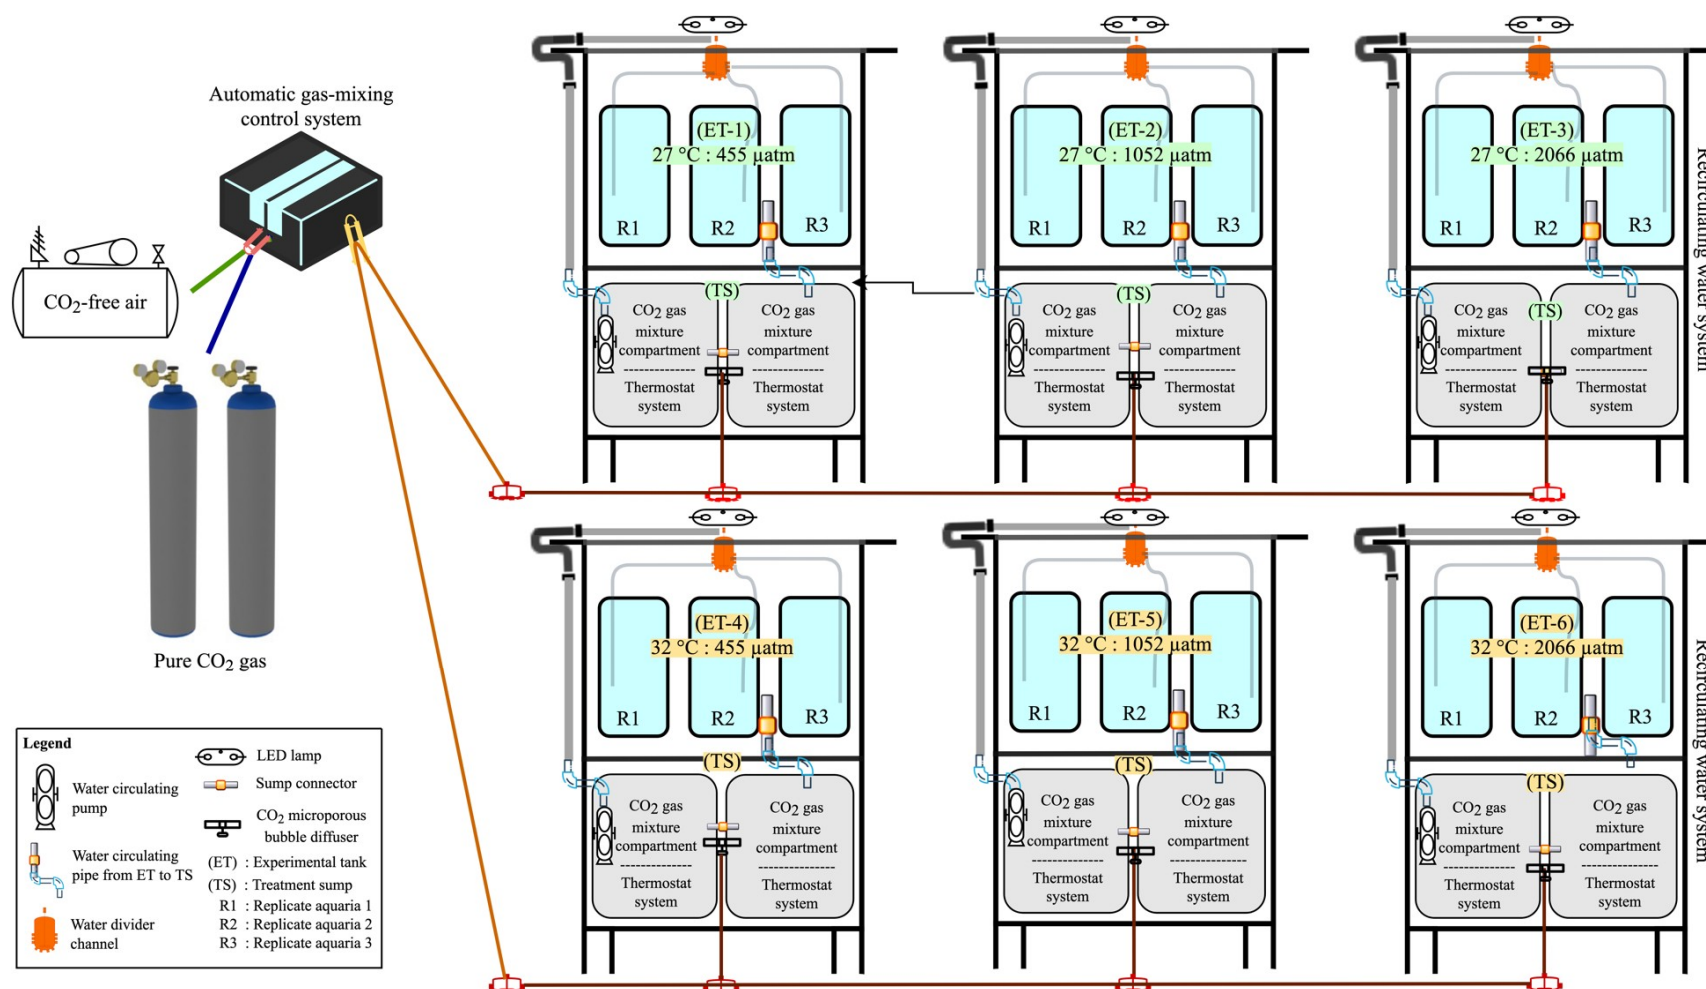

**Figure S1.** Schematic of ocean acidification and ocean warming experimental design with a fully factorial combination of low  $p\text{CO}_2$  (455  $\mu\text{atm}$ ), moderate  $p\text{CO}_2$  (1052  $\mu\text{atm}$ ), and high  $p\text{CO}_2$  (2066  $\mu\text{atm}$ ) treatments with ambient temperature (27 °C) and high temperature (32 °C) treatments.

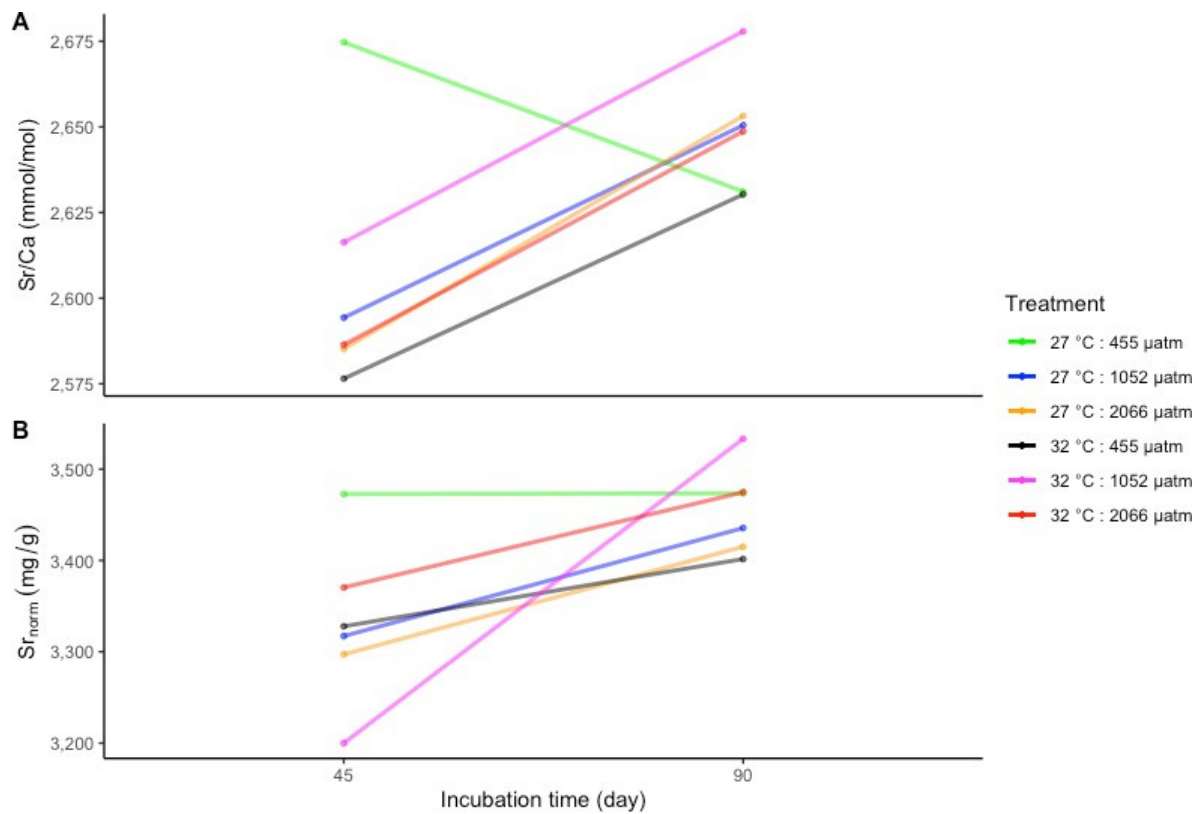

**Figure S2.** Skeletal Sr values over incubation time in *A. yairi* exposed to elevated temperatures levels (27 °C and 32 °C) crossed with increased  $p\text{CO}_2$  concentrations (455  $\mu\text{atm}$ , 1052  $\mu\text{atm}$ , and 2066  $\mu\text{atm}$ ). (A) Sr/Ca ratio (mmol/mol), (B) Sr<sub>norm</sub> ratio (mg/g). Data were presented as mean (n = 36).



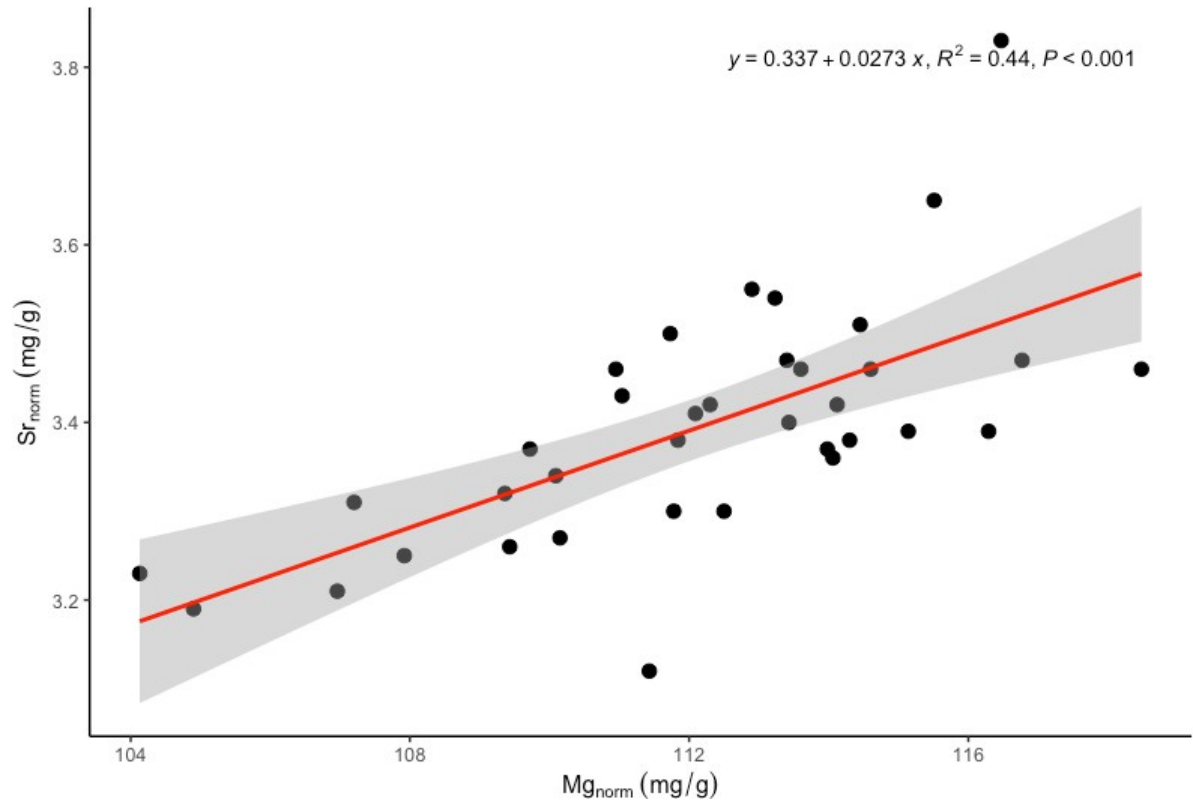

**Figure S3.** Correlation of Sr<sub>norm</sub> ratios (mg/g) against Mg<sub>norm</sub> ratios (mg/g) ( $R^2 = 0.44$ ,  $F_{1, 34} = 26.78$ ,  $p = 1.019 \times 10^{-5}$ ) in *A. yairi* exposed to elevated temperatures levels (27 °C and 32 °C) crossed with increased  $p\text{CO}_2$  concentrations (455  $\mu\text{atm}$ , 1052  $\mu\text{atm}$ , and 2066  $\mu\text{atm}$ ). (n = 36).

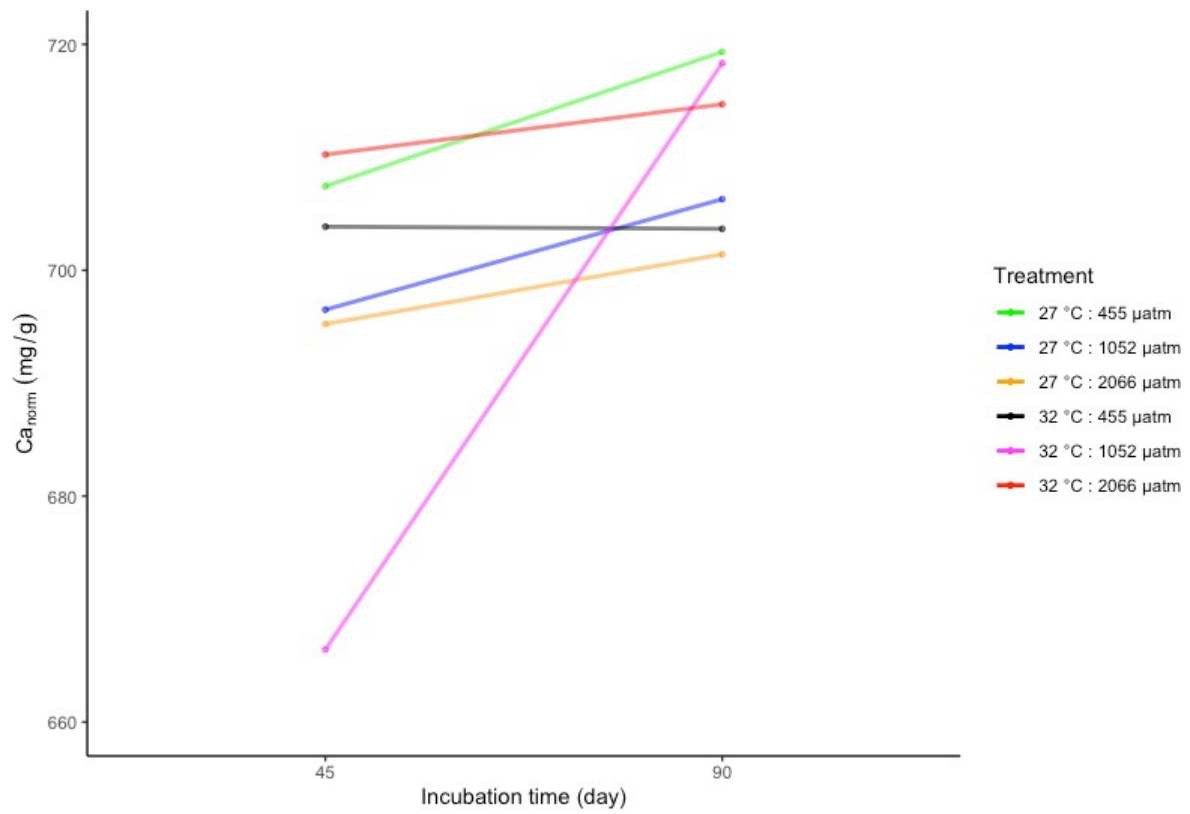

**Figure S4.** Skeletal Ca<sub>norm</sub> (mg/g) ratio over incubation time in *A. yairi* exposed to elevated temperatures levels (27 °C and 32 °C) crossed with increased *p*CO<sub>2</sub> concentrations (455 µatm, 1052 µatm, and 2066 µatm). Data were presented as mean (n = 36).
